# Supplementary material for: Relationship between physical activity and DNA methylation-predicted epigenetic clocks
Source: Springer Nature journal article supplement (doi:10.1038/s41514-025-00217-0), 2025-04-12
Supplement: MOESM1 [file 41514_2025_217_MOESM1_ESM.pdf]

**Abbreviations List:**

PA: Physical Activity

DNAm: DNA Methylation

BMI: Body Mass Index

PIR: Poverty Income Ratio

HorvathAge: Horvath's Epigenetic Age

HannumAge: Hannum's Epigenetic Age

SkinBloodAge: Skin and Blood Epigenetic Age

LinAge: Lin's Epigenetic Age

WeidnerAge: Weidner's Epigenetic Age

VidalBravoAge: Vidal-Bravo Epigenetic Age

ZhangAge: Zhang's Epigenetic Age

PhenoAge: Phenotypic Age

For HorvathAge (Table S1), PA was significantly inversely associated in both males ( $\beta = -0.01$ , 95% CI: -0.015 to -0.004) and females ( $\beta = -0.009$ , 95% CI: -0.015 to -0.004). This association was particularly strong in non-Hispanic whites ( $\beta = -0.013$ , 95% CI: -0.017 to -0.008) and participants with a poverty income ratio (PIR) of 1–3 ( $\beta = -0.016$ , 95% CI: -0.024 to -0.008), as well as those with a BMI between 25 and 30 ( $\beta = -0.012$ , 95% CI: -0.022 to -0.003) and former smokers ( $\beta = -0.01$ , 95% CI: -0.018 to -0.001).

Table S1. Subgroup analysis of the association between physical activity and DNA methylation-predicted HorvathAge

| Subgroups                   | $\beta$ (95% CI)      | p-value | p for interaction |
|-----------------------------|-----------------------|---------|-------------------|
| Gender                      |                       |         | 0.898             |
| Male                        | -0.01(-0.015,-0.004)  | <0.001  |                   |
| Female                      | -0.009(-0.015,-0.004) | <0.001  |                   |
| Race/ethnicity              |                       |         | < 0.001           |
| Non-hispanic White          | -0.013(-0.017,-0.008) | <0.0001 |                   |
| Non-hispanic Black          | 0.004(-0.004,0.013)   | 0.298   |                   |
| Mexican American            | -0.001(-0.011,0.010)  | 0.902   |                   |
| Other race/ethnicity        | 0.003(-0.008,0.014)   | 0.446   |                   |
| Marital status              |                       |         | 0.059             |
| Never married               | 0.006(-Inf,Inf)       | 0.296   |                   |
| Married/living with partner | -0.009(-0.013,-0.004) | <0.001  |                   |
| Widowed/ divorced           | -0.016(-0.030,-0.002) | 0.029   |                   |
| Poverty income ratio        |                       |         | 0.021             |
| < 1                         | 0(-0.006,0.007)       | 0.923   |                   |
| [1,3)                       | -0.016(-0.024,-0.008) | <0.001  |                   |
| $\geq 3$                    | -0.007(-0.012,-0.002) | 0.012   |                   |
| Education                   |                       |         | 0.798             |
| Below high school           | -0.008(-0.033,0.016)  | 0.491   |                   |
| High school                 | -0.01(-0.018,-0.003)  | 0.006   |                   |
| College or above            | -0.007(-0.016,0.002)  | 0.107   |                   |
| BMI (kg/m <sup>2</sup> )    |                       |         | 0.676             |
| < 25                        | -0.006(-0.017,0.004)  | 0.209   |                   |
| [25, 30)                    | -0.012(-0.022,-0.003) | 0.010   |                   |
| $\geq 30$                   | -0.009(-0.018,-0.001) | 0.029   |                   |
| Smoking status              |                       |         | 0.916             |
| Never smoking               | -0.008(-0.016,0.001)  | 0.079   |                   |
| Former smoking              | -0.01(-0.018,-0.001)  | 0.032   |                   |
| Current smoking             | -0.01(-0.018,-0.002)  | 0.021   |                   |
| Alcohol use status          |                       |         | 0.075             |
| None                        | -0.009(-0.016,-0.002) | 0.010   |                   |
| Moderate alcohol use        | -0.012(-0.018,-0.005) | 0.001   |                   |
| High alcohol use            | 0.005(-0.008,0.017)   | 0.447   |                   |

Similarly, for HannumAge (Table S2), PA was associated with lower age predictions in both males ( $\beta = -0.007$ , 95% CI: -0.013 to -0.001) and females ( $\beta = -0.01$ , 95% CI: -0.018 to -0.001). Non-Hispanic whites ( $\beta = -0.011$ , 95% CI: -0.017 to -0.005), participants with a PIR of 1–3 ( $\beta = -0.016$ , 95% CI: -0.023 to -0.008), and moderate alcohol consumers ( $\beta = -0.01$ , 95% CI: -0.017 to -0.002) demonstrated particularly strong negative associations with HannumAge.

Table S2. Subgroup analysis of the association between physical activity and DNA methylation-predicted HannumAge.

| Subgroups                   | $\beta$ (95% CI)      | p-value | p for interaction |
|-----------------------------|-----------------------|---------|-------------------|
| Gender                      |                       |         | 0.452             |
| Male                        | -0.007(-0.013,-0.001) | 0.023   |                   |
| Female                      | -0.01(-0.018,-0.001)  | 0.023   |                   |
| Race/ethnicity              |                       |         | < 0.0001          |
| Non-hispanic White          | -0.011(-0.017,-0.005) | <0.001  |                   |
| Non-hispanic Black          | 0.007(-0.002,0.017)   | 0.116   |                   |
| Mexican American            | -0.002(-0.010,0.006)  | 0.587   |                   |
| Other race/ethnicity        | 0.006(-0.006,0.018)   | 0.211   |                   |
| Marital status              |                       |         | 0.015             |
| Never married               | 0.011(-Inf,Inf)       | 0.176   |                   |
| Married/living with partner | -0.007(-0.012,-0.002) | 0.009   |                   |
| Widowed/ divorced           | -0.013(-0.026,-0.001) | 0.042   |                   |
| Poverty income ratio        |                       |         | 0.003             |
| < 1                         | 0.002(-0.006,0.010)   | 0.577   |                   |
| [1,3)                       | -0.016(-0.023,-0.008) | <0.001  |                   |
| $\geq 3$                    | -0.003(-0.010,0.003)  | 0.289   |                   |
| Education                   |                       |         | 0.675             |
| Below high school           | 0.003(-0.024,0.029)   | 0.816   |                   |
| High school                 | -0.008(-0.017,0.000)  | 0.049   |                   |
| College or above            | -0.005(-0.014,0.004)  | 0.280   |                   |
| BMI (kg/m <sup>2</sup> )    |                       |         | 0.834             |
| < 25                        | -0.006(-0.019,0.006)  | 0.326   |                   |
| [25, 30)                    | -0.01(-0.021,0.001)   | 0.065   |                   |
| $\geq 30$                   | -0.005(-0.016,0.006)  | 0.333   |                   |
| Smoking status              |                       |         | 0.962             |
| Never smoking               | -0.006(-0.016,0.004)  | 0.229   |                   |
| Former smoking              | -0.008(-0.017,0.002)  | 0.126   |                   |
| Current smoking             | -0.007(-0.017,0.002)  | 0.106   |                   |
| Alcohol use status          |                       |         | 0.182             |
| None                        | -0.007(-0.015,0.002)  | 0.115   |                   |
| Moderate alcohol use        | -0.01(-0.017,-0.002)  | 0.013   |                   |
| High alcohol use            | 0.005(-0.008,0.017)   | 0.434   |                   |

In the case of SkinBloodAge (Table S3), PA was significantly associated with lower predicted ages in both males ( $\beta = -0.01$ , 95% CI: -0.015 to -0.004) and females ( $\beta = -0.009$ , 95% CI: -0.015 to -0.004). The effect was most pronounced in non-Hispanic whites ( $\beta = -0.013$ , 95% CI: -0.017 to -0.008) and participants with a PIR of 1–3 ( $\beta = -0.016$ , 95% CI: -0.024 to -0.008). Notably, those with a BMI between 25 and 30 also showed a significant reduction in SkinBloodAge ( $\beta = -0.012$ , 95% CI: -0.022 to -0.003).

Table S3. Subgroup analysis of the association between physical activity and DNA methylation-predicted SkinBloodAge.

| Subgroups                   | $\beta$ (95% CI)      | p-value | p for interaction |
|-----------------------------|-----------------------|---------|-------------------|
| Gender                      |                       |         | 0.898             |
| Male                        | -0.01(-0.015,-0.004)  | <0.001  |                   |
| Female                      | -0.009(-0.015,-0.004) | <0.001  |                   |
| Race/ethnicity              |                       |         | < 0.0001          |
| Non-hispanic White          | -0.013(-0.017,-0.008) | <0.0001 |                   |
| Non-hispanic Black          | 0.004(-0.004,0.013)   | 0.298   |                   |
| Mexican American            | -0.001(-0.011,0.010)  | 0.902   |                   |
| Other race/ethnicity        | 0.003(-0.008,0.014)   | 0.446   |                   |
| Marital status              |                       |         | 0.059             |
| Never married               | 0.006(-Inf,Inf)       | 0.296   |                   |
| Married/living with partner | -0.009(-0.013,-0.004) | <0.001  |                   |
| Widowed/ divorced           | -0.016(-0.030,-0.002) | 0.029   |                   |
| Poverty income ratio        |                       |         | 0.021             |
| < 1                         | 0(-0.006,0.007)       | 0.923   |                   |
| [1,3)                       | -0.016(-0.024,-0.008) | <0.001  |                   |
| $\geq 3$                    | -0.007(-0.012,-0.002) | 0.012   |                   |
| Education                   |                       |         | 0.798             |
| Below high school           | -0.008(-0.033,0.016)  | 0.491   |                   |
| High school                 | -0.01(-0.018,-0.003)  | 0.006   |                   |
| College or above            | -0.007(-0.016,0.002)  | 0.107   |                   |
| BMI (kg/m <sup>2</sup> )    |                       |         | 0.676             |
| < 25                        | -0.006(-0.017,0.004)  | 0.209   |                   |
| [25, 30)                    | -0.012(-0.022,-0.003) | 0.010   |                   |
| $\geq 30$                   | -0.009(-0.018,-0.001) | 0.029   |                   |
| Smoking status              |                       |         | 0.916             |
| Never smoking               | -0.008(-0.016,0.001)  | 0.079   |                   |
| Former smoking              | -0.01(-0.018,-0.001)  | 0.032   |                   |
| Current smoking             | -0.01(-0.018,-0.002)  | 0.021   |                   |
| Alcohol use status          |                       |         | 0.075             |
| None                        | -0.009(-0.016,-0.002) | 0.010   |                   |
| Moderate alcohol use        | -0.012(-0.018,-0.005) | 0.001   |                   |
| High alcohol use            | 0.005(-0.008,0.017)   | 0.447   |                   |

For LinAge (Table S4), PA was negatively associated with predicted age in both males ( $\beta = -0.011$ , 95% CI: -0.018 to -0.004,  $p = 0.005$ ) and females ( $\beta = -0.016$ , 95% CI: -0.023 to -0.008,  $p < 0.001$ ). Non-Hispanic whites ( $\beta = -0.015$ , 95% CI: -0.022 to -0.008) and those with a BMI of 30 or greater ( $\beta = -0.016$ , 95% CI: -0.026 to -0.005) exhibited significant reductions in LinAge.

Table S4. Subgroup analysis of the association between physical activity and DNA methylation-predicted LinAge.

| Subgroups                   | $\beta$ (95% CI)      | p-value | p for interaction |
|-----------------------------|-----------------------|---------|-------------------|
| Gender                      |                       |         | 0.312             |
| Male                        | -0.011(-0.018,-0.004) | 0.005   |                   |
| Female                      | -0.016(-0.023,-0.008) | <0.001  |                   |
| Race/ethnicity              |                       |         | 0.023             |
| Non-hispanic White          | -0.015(-0.022,-0.008) | <0.001  |                   |
| Non-hispanic Black          | 0.002(-0.009,0.013)   | 0.712   |                   |
| Mexican American            | -0.004(-0.015,0.007)  | 0.434   |                   |
| Other race/ethnicity        | -0.006(-0.020,0.008)  | 0.320   |                   |
| Marital status              |                       |         | 0.387             |
| Never married               | -0.009(-Inf,Inf)      | 0.256   |                   |
| Married/living with partner | -0.01(-0.017,-0.004)  | 0.004   |                   |
| Widowed/ divorced           | -0.019(-0.036,-0.001) | 0.037   |                   |
| Poverty income ratio        |                       |         | 0.002             |
| < 1                         | -0.009(-0.024,0.006)  | 0.200   |                   |
| [1,3)                       | -0.026(-0.035,-0.018) | <0.0001 |                   |
| $\geq 3$                    | -0.004(-0.013,0.005)  | 0.407   |                   |
| Education                   |                       |         | 0.127             |
| Below high school           | -0.008(-0.041,0.025)  | 0.609   |                   |
| High school                 | -0.016(-0.024,-0.008) | <0.001  |                   |
| College or above            | -0.004(-0.013,0.006)  | 0.403   |                   |
| BMI (kg/m <sup>2</sup> )    |                       |         | 0.724             |
| < 25                        | -0.012(-0.025,0.000)  | 0.043   |                   |
| [25, 30)                    | -0.009(-0.019,0.001)  | 0.063   |                   |
| $\geq 30$                   | -0.016(-0.026,-0.005) | 0.006   |                   |
| Smoking status              |                       |         | 0.237             |
| Never smoking               | -0.006(-0.015,0.002)  | 0.147   |                   |
| Former smoking              | -0.015(-0.023,-0.008) | <0.001  |                   |
| Current smoking             | -0.013(-0.025,-0.002) | 0.023   |                   |
| Alcohol use status          |                       |         | 0.612             |
| None                        | -0.014(-0.025,-0.003) | 0.017   |                   |
| Moderate alcohol use        | -0.012(-0.021,-0.003) | 0.009   |                   |
| High alcohol use            | -0.002(-0.027,0.023)  | 0.855   |                   |

For WeidnerAge (Table S5), a similar trend was observed, with significant inverse associations between PA and age predictions in males ( $\beta = -0.01$ , 95% CI: -0.017 to -0.002) and non-Hispanic whites ( $\beta = -0.013$ , 95% CI: -0.020 to -0.005). Additionally, participants with a PIR of 1–3 ( $\beta = -0.016$ , 95% CI: -0.028 to -0.004) and current smokers ( $\beta = -0.017$ , 95% CI: -0.027 to -0.007) exhibited notable reductions in WeidnerAge.

Table S5. Subgroup analysis of the association between physical activity and DNA methylation-predicted WeidnerAge.

| Subgroups                   | $\beta$ (95% CI)      | p-value | p for interaction |
|-----------------------------|-----------------------|---------|-------------------|
| Gender                      |                       |         | 0.663             |
| Male                        | -0.01(-0.017,-0.002)  | 0.013   |                   |
| Female                      | -0.006(-0.021,0.008)  | 0.377   |                   |
| Race/ethnicity              |                       |         | < 0.001           |
| Non-hispanic White          | -0.013(-0.020,-0.005) | 0.002   |                   |
| Non-hispanic Black          | -0.006(-0.015,0.004)  | 0.218   |                   |
| Mexican American            | 0(-0.019,0.020)       | 0.980   |                   |
| Other race/ethnicity        | 0.012(0.002,0.022)    | 0.027   |                   |
| Marital status              |                       |         | 0.207             |
| Never married               | 0.011(-Inf,Inf)       | 0.268   |                   |
| Married/living with partner | -0.01(-0.016,-0.004)  | 0.002   |                   |
| Widowed/ divorced           | -0.012(-0.037,0.013)  | 0.336   |                   |
| Poverty income ratio        |                       |         | 0.051             |
| < 1                         | 0.003(-0.004,0.009)   | 0.439   |                   |
| [1,3)                       | -0.016(-0.028,-0.004) | 0.010   |                   |
| $\geq 3$                    | -0.006(-0.014,0.002)  | 0.118   |                   |
| Education                   |                       |         | 0.798             |
| Below high school           | -0.018(-0.044,0.007)  | 0.139   |                   |
| High school                 | -0.008(-0.018,0.001)  | 0.084   |                   |
| College or above            | -0.008(-0.020,0.004)  | 0.204   |                   |
| BMI (kg/m <sup>2</sup> )    |                       |         | 0.52              |
| < 25                        | -0.005(-0.022,0.013)  | 0.577   |                   |
| [25, 30)                    | -0.008(-0.018,0.002)  | 0.124   |                   |
| $\geq 30$                   | -0.014(-0.024,-0.004) | 0.008   |                   |
| Smoking status              |                       |         | 0.084             |
| Never smoking               | 0(-0.010,0.010)       | 0.995   |                   |
| Former smoking              | -0.01(-0.022,0.001)   | 0.079   |                   |
| Current smoking             | -0.017(-0.027,-0.007) | 0.002   |                   |
| Alcohol use status          |                       |         | 0.857             |
| None                        | -0.006(-0.019,0.007)  | 0.350   |                   |
| Moderate alcohol use        | -0.01(-0.020,0.000)   | 0.044   |                   |
| High alcohol use            | -0.008(-0.031,0.015)  | 0.459   |                   |

PA also had a significant effect on VidalBraloAge (Table S6), particularly in males ( $\beta = -0.005$ , 95% CI: -0.009 to 0.000) and non-Hispanic whites ( $\beta = -0.007$ , 95% CI: -0.012 to -0.003). Individuals with a high school education ( $\beta = -0.007$ , 95% CI: -0.012 to -0.001) and a BMI of 30 or greater ( $\beta = -0.008$ , 95% CI: -0.014 to -0.003) also showed significant reductions in predicted age. Table S6. Subgroup analysis of the association between physical activity and DNA methylation-predicted VidalBraloAge.

| Subgroups                   | $\beta$ (95% CI)      | p-value | p for interaction |
|-----------------------------|-----------------------|---------|-------------------|
| Gender                      |                       |         | 0.495             |
| Male                        | -0.005(-0.009,0.000)  | 0.039   |                   |
| Female                      | -0.007(-0.015,0.000)  | 0.051   |                   |
| Race/ethnicity              |                       |         | 0.017             |
| Non-hispanic White          | -0.007(-0.012,-0.003) | 0.003   |                   |
| Non-hispanic Black          | 0.001(-0.007,0.009)   | 0.734   |                   |
| Mexican American            | -0.002(-0.012,0.008)  | 0.719   |                   |
| Other race/ethnicity        | 0.002(-0.004,0.007)   | 0.474   |                   |
| Marital status              |                       |         | 0.381             |
| Never married               | 0(-Inf,Inf)           | 0.885   |                   |
| Married/living with partner | -0.006(-0.010,-0.002) | 0.002   |                   |
| Widowed/ divorced           | -0.003(-0.015,0.009)  | 0.660   |                   |
| Poverty income ratio        |                       |         | 0.224             |
| < 1                         | -0.001(-0.008,0.007)  | 0.857   |                   |
| [1,3)                       | -0.009(-0.017,-0.001) | 0.032   |                   |
| $\geq 3$                    | -0.004(-0.008,0.001)  | 0.115   |                   |
| Education                   |                       |         | 0.119             |
| Below high school           | -0.016(-0.034,0.001)  | 0.066   |                   |
| High school                 | -0.007(-0.012,-0.001) | 0.015   |                   |
| College or above            | -0.001(-0.007,0.006)  | 0.850   |                   |
| BMI (kg/m <sup>2</sup> )    |                       |         | 0.422             |
| < 25                        | -0.005(-0.012,0.003)  | 0.200   |                   |
| [25, 30)                    | -0.003(-0.009,0.003)  | 0.383   |                   |
| $\geq 30$                   | -0.008(-0.014,-0.003) | 0.005   |                   |
| Smoking status              |                       |         | 0.799             |
| Never smoking               | -0.004(-0.009,0.001)  | 0.085   |                   |
| Former smoking              | -0.006(-0.012,0.000)  | 0.037   |                   |
| Current smoking             | -0.005(-0.011,0.002)  | 0.149   |                   |
| Alcohol use status          |                       |         | 0.043             |
| None                        | -0.008(-0.014,-0.002) | 0.009   |                   |
| Moderate alcohol use        | -0.004(-0.010,0.002)  | 0.166   |                   |
| High alcohol use            | 0.005(-0.002,0.011)   | 0.147   |                   |

For ZhangAge (Table S7), PA was inversely associated with predicted age in both males ( $\beta = -0.003$ , 95% CI: -0.006 to -0.001) and females ( $\beta = -0.004$ , 95% CI: -0.006 to -0.001). Non-Hispanic whites ( $\beta = -0.005$ , 95% CI: -0.007 to -0.003) and individuals with a BMI between 25 and 30 ( $\beta = -0.005$ , 95% CI: -0.009 to -0.002) showed strong negative associations with ZhangAge.

Table S7. Subgroup analysis of the association between physical activity and DNA methylation-predicted ZhangAge.

| Subgroups                   | $\beta$ (95% CI)      | p-value | p for interaction |
|-----------------------------|-----------------------|---------|-------------------|
| Gender                      |                       |         | 0.72              |
| Male                        | -0.003(-0.006,-0.001) | 0.010   |                   |
| Female                      | -0.004(-0.006,-0.001) | 0.004   |                   |
| Race/ethnicity              |                       |         | < 0.001           |
| Non-hispanic White          | -0.005(-0.007,-0.003) | <0.001  |                   |
| Non-hispanic Black          | 0.002(-0.001,0.006)   | 0.191   |                   |
| Mexican American            | -0.002(-0.005,0.002)  | 0.351   |                   |
| Other race/ethnicity        | 0.001(-0.004,0.005)   | 0.635   |                   |
| Marital status              |                       |         | 0.033             |
| Never married               | 0.002(-Inf,Inf)       | 0.337   |                   |
| Married/living with partner | -0.003(-0.005,-0.001) | 0.004   |                   |
| Widowed/ divorced           | -0.006(-0.011,-0.001) | 0.014   |                   |
| Poverty income ratio        |                       |         | 0.015             |
| < 1                         | -0.001(-0.003,0.002)  | 0.697   |                   |
| [1,3)                       | -0.007(-0.011,-0.003) | <0.001  |                   |
| $\geq 3$                    | -0.002(-0.004,0.001)  | 0.137   |                   |
| Education                   |                       |         | 0.649             |
| Below high school           | -0.004(-0.013,0.005)  | 0.383   |                   |
| High school                 | -0.004(-0.008,-0.001) | 0.019   |                   |
| College or above            | -0.002(-0.006,0.001)  | 0.228   |                   |
| BMI (kg/m <sup>2</sup> )    |                       |         | 0.536             |
| < 25                        | -0.002(-0.006,0.002)  | 0.261   |                   |
| [25, 30)                    | -0.005(-0.009,-0.002) | 0.004   |                   |
| $\geq 30$                   | -0.003(-0.008,0.002)  | 0.223   |                   |
| Smoking status              |                       |         | 0.715             |
| Never smoking               | -0.002(-0.006,0.002)  | 0.230   |                   |
| Former smoking              | -0.004(-0.007,0.000)  | 0.036   |                   |
| Current smoking             | -0.004(-0.008,-0.001) | 0.010   |                   |
| Alcohol use status          |                       |         | 0.127             |
| None                        | -0.004(-0.007,-0.001) | 0.024   |                   |
| Moderate alcohol use        | -0.004(-0.007,-0.001) | 0.006   |                   |
| High alcohol use            | 0.002(-0.003,0.007)   | 0.412   |                   |



Finally, for PhenoAge (Table S8), PA was associated with lower predicted ages in both males ( $\beta = -0.008$ , 95% CI: -0.013 to -0.003) and females ( $\beta = -0.009$ , 95% CI: -0.018 to -0.001). Significant reductions were observed in non-Hispanic whites ( $\beta = -0.012$ , 95% CI: -0.017 to -0.006), individuals with a high school education ( $\beta = -0.011$ , 95% CI: -0.018 to -0.004), and current smokers ( $\beta = -0.009$ , 95% CI: -0.016 to -0.001).

Table S8. Subgroup analysis of the association between physical activity and DNA methylation-predicted PhenoAge.

| Subgroups                   | $\beta$ (95% CI)      | p-value | p for interaction |
|-----------------------------|-----------------------|---------|-------------------|
| Gender                      |                       |         | 0.738             |
| Male                        | -0.008(-0.013,-0.003) | 0.003   |                   |
| Female                      | -0.009(-0.018,-0.001) | 0.032   |                   |
| Race/ethnicity              |                       |         | 0.005             |
| Non-hispanic White          | -0.012(-0.017,-0.006) | <0.001  |                   |
| Non-hispanic Black          | 0.007(-0.004,0.018)   | 0.199   |                   |
| Mexican American            | -0.002(-0.017,0.014)  | 0.833   |                   |
| Other race/ethnicity        | 0.003(-0.011,0.017)   | 0.566   |                   |
| Marital status              |                       |         | 0.452             |
| Never married               | 0.001(-Inf,Inf)       | 0.646   |                   |
| Married/living with partner | -0.008(-0.014,-0.002) | 0.009   |                   |
| Widowed/ divorced           | -0.008(-0.025,0.008)  | 0.313   |                   |
| Poverty income ratio        |                       |         | 0.122             |
| < 1                         | -0.001(-0.012,0.009)  | 0.766   |                   |
| [1,3)                       | -0.014(-0.023,-0.006) | 0.002   |                   |
| $\geq 3$                    | -0.004(-0.012,0.003)  | 0.248   |                   |
| Education                   |                       |         | 0.164             |
| Below high school           | -0.01(-0.041,0.021)   | 0.502   |                   |
| High school                 | -0.011(-0.018,-0.004) | 0.004   |                   |
| College or above            | -0.001(-0.009,0.006)  | 0.680   |                   |
| BMI (kg/m <sup>2</sup> )    |                       |         | 0.812             |
| < 25                        | -0.006(-0.015,0.004)  | 0.246   |                   |
| [25, 30)                    | -0.008(-0.017,0.000)  | 0.054   |                   |
| $\geq 30$                   | -0.01(-0.020,0.000)   | 0.046   |                   |
| Smoking status              |                       |         | 0.988             |
| Never smoking               | -0.008(-0.018,0.001)  | 0.084   |                   |
| Former smoking              | -0.008(-0.016,0.000)  | 0.057   |                   |
| Current smoking             | -0.009(-0.016,-0.001) | 0.026   |                   |
| Alcohol use status          |                       |         | 0.475             |
| None                        | -0.008(-0.015,-0.002) | 0.015   |                   |
| Moderate alcohol use        | -0.009(-0.016,-0.001) | 0.021   |                   |
| High alcohol use            | 0(-0.015,0.015)       | 0.987   |                   |
